# Supplementary material for: Modeling Binary and Multicomponent Systems Containing Supercritical CO2 with Polyethylene Glycols and Compounds Relevant to the Biodiesel Production
Source: MDPI journal article supplement (doi:10.3390/molecules27185785), 2022-09-07
Supplement: s1 [file s1]

**Modeling Binary and Multicomponent Systems Containing Supercritical CO<sub>2</sub> with Polyethylene Glycols and Compounds Relevant to the Biodiesel Production**

**Ioannis Tsivintzelis<sup>1</sup>, George Koutsou<sup>1</sup>, Georgios M. Kontogeorgis<sup>2</sup>**

<sup>1</sup>*Aristotle University of Thessaloniki, Department of Chemical Engineering, 54124, Greece*

<sup>2</sup>*Center for Energy Resources Engineering (CERE), Department of Chemical and Biochemical Engineering, Technical University of Denmark, DK-2800 Kgs. Lyngby, Denmark*

\*Corresponding author: Ioannis Tsivintzelis: E-mail: [tioannis@cheng.auth.gr](mailto:tioannis@cheng.auth.gr)

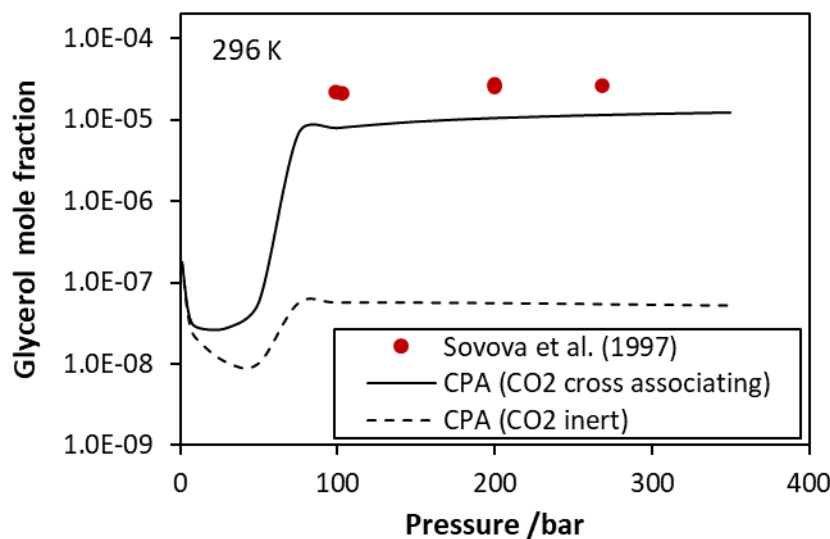

**Figure S1.** CO<sub>2</sub> - glycerol VLE. Glycerol mole fraction in the vapor phase. Experimental data [40] and CPA correlations using the interaction parameters of Table 4 of the main article.

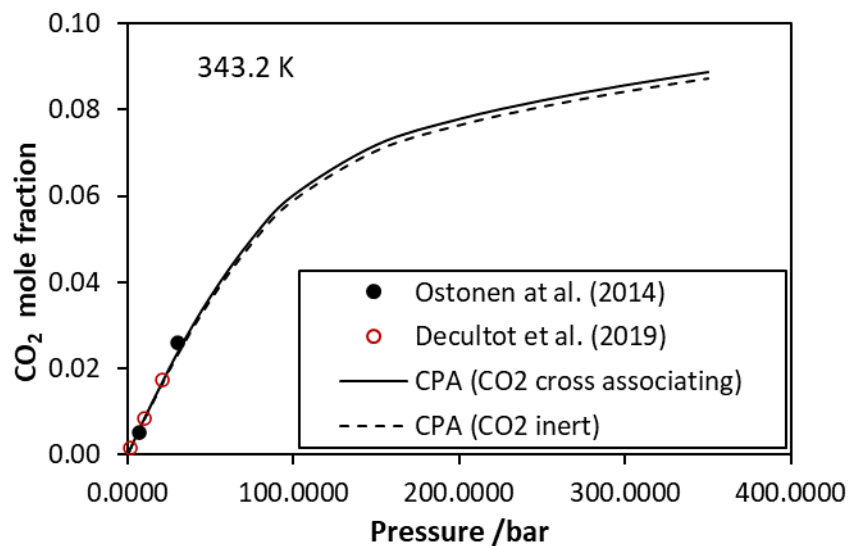

**Figure S2.** CO<sub>2</sub> - glycerol VLE. CO<sub>2</sub> mole fraction in the liquid phase. Experimental data [41,42] and CPA correlations using the interaction parameters of Table 4 of the main article.

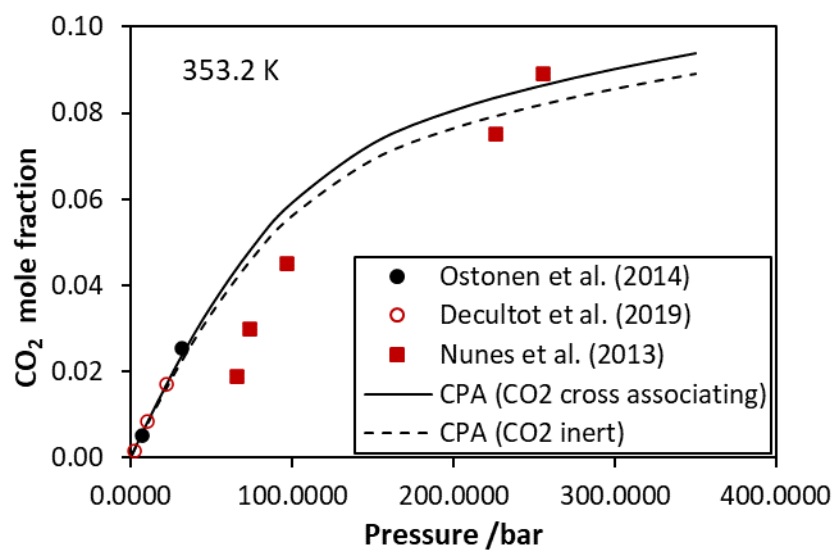

**Figure S3.** CO<sub>2</sub> - glycerol VLE. CO<sub>2</sub> mole fraction in the liquid phase. Experimental data [39,41,42] and CPA correlations using the interaction parameters of Table 4 of the main article.

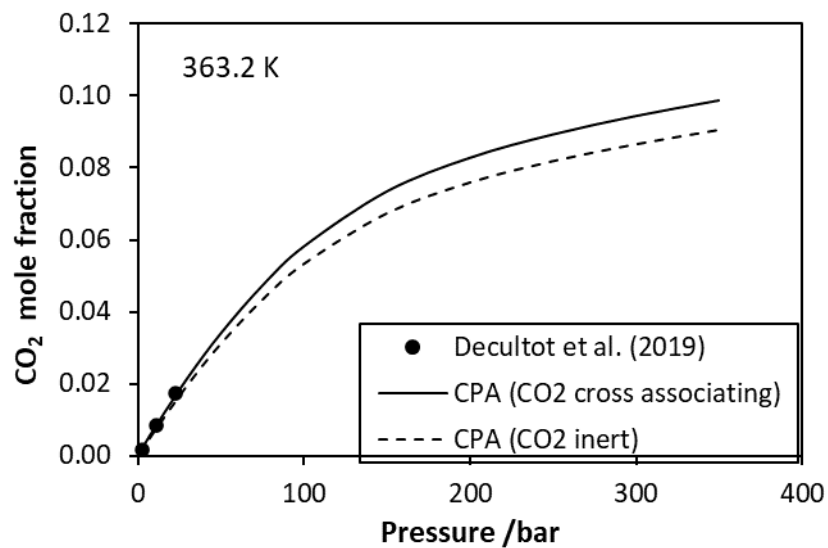

**Figure S4.** CO<sub>2</sub> - glycerol VLE. CO<sub>2</sub> mole fraction in the liquid phase. Experimental data [42] and CPA correlations using the interaction parameters of Table 4 of the main article.

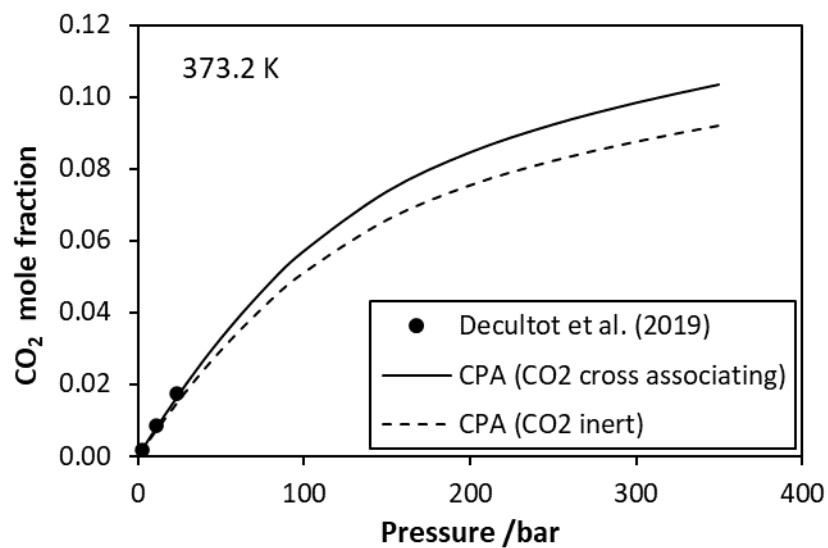

**Figure S5.** CO<sub>2</sub> - glycerol VLE. CO<sub>2</sub> mole fraction in the liquid phase. Experimental data [42] and CPA correlations using the interaction parameters of Table 4 of the main article.

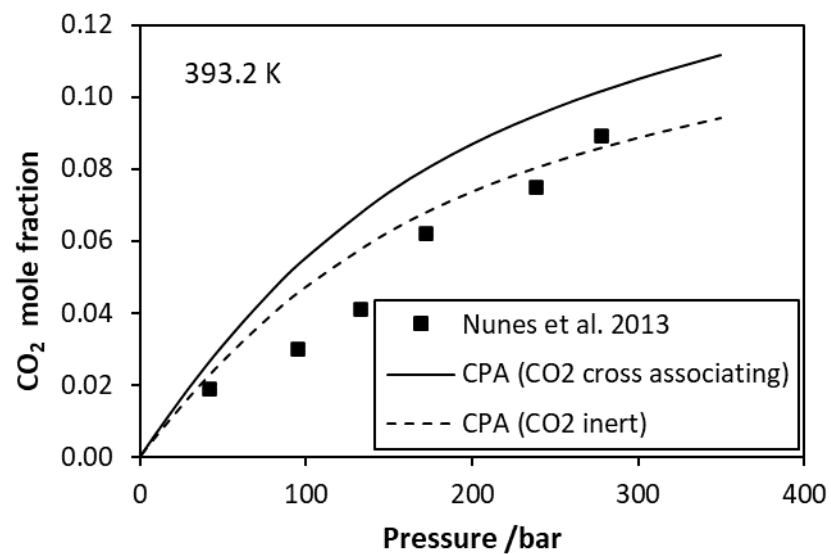

**Figure S6.** CO<sub>2</sub> - glycerol VLE. CO<sub>2</sub> mole fraction in the liquid phase. Experimental data [39] and CPA correlations using the interaction parameters of Table 4 of the main article.

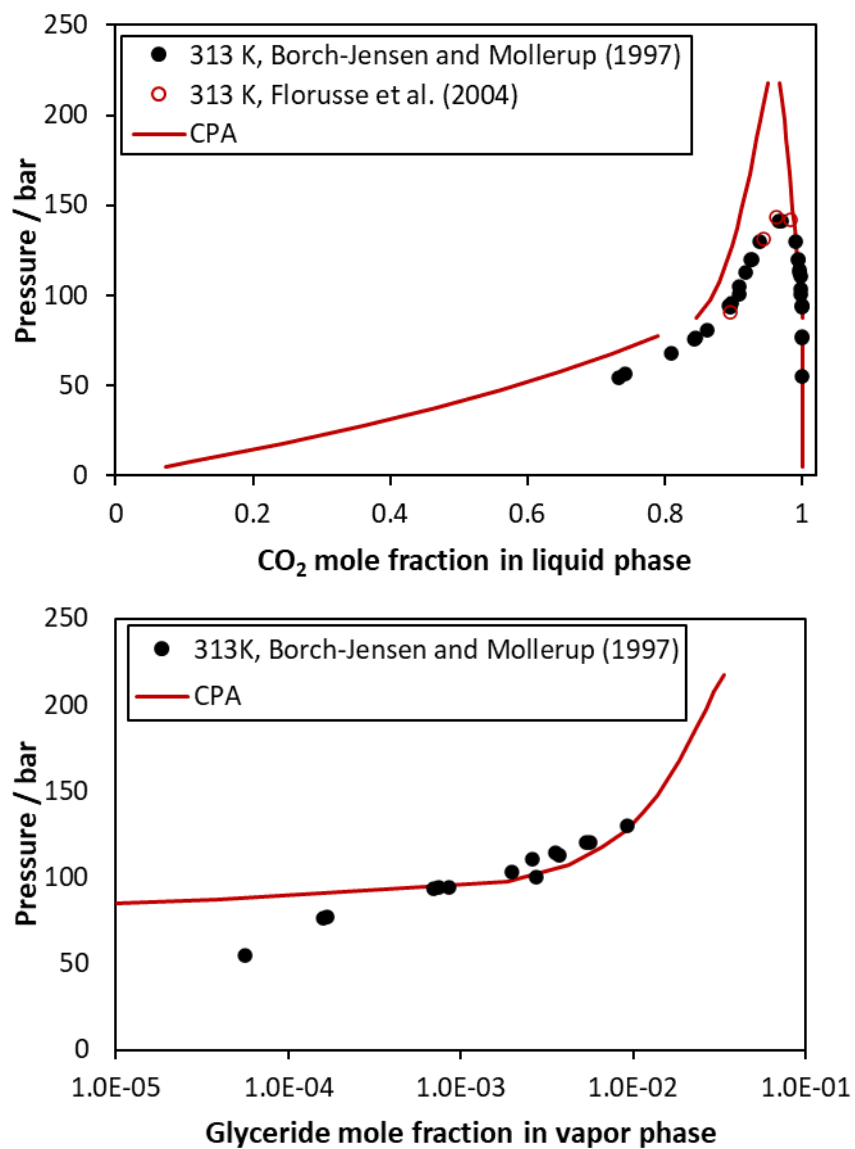

**Figure S7.** CO<sub>2</sub> - tricaprilyn VLE at 313 K. Experimental data [43,44] and CPA correlations using the binary parameter of Table 5 of the main article.

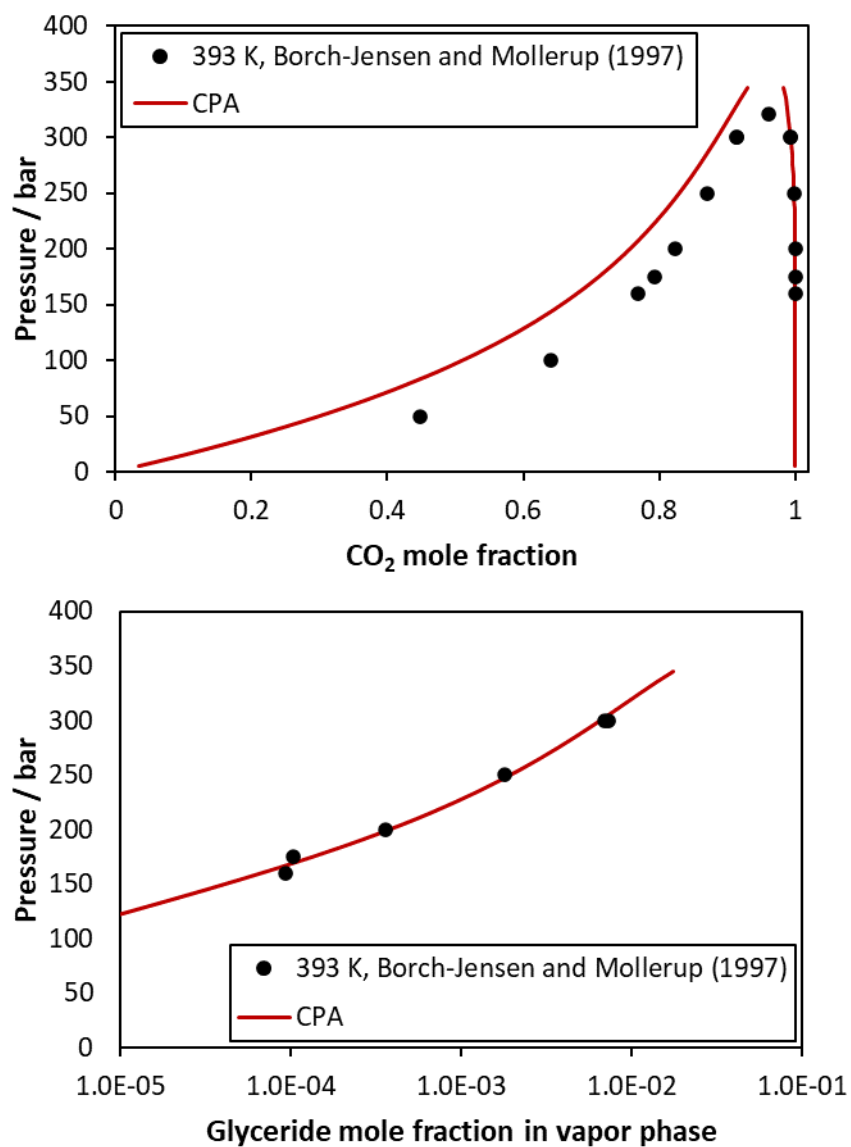

**Figure S8.** CO<sub>2</sub> - tricaprilyn VLE at 393 K. Experimental data [43] and CPA correlations using the binary parameter of Table 5 of the main article.

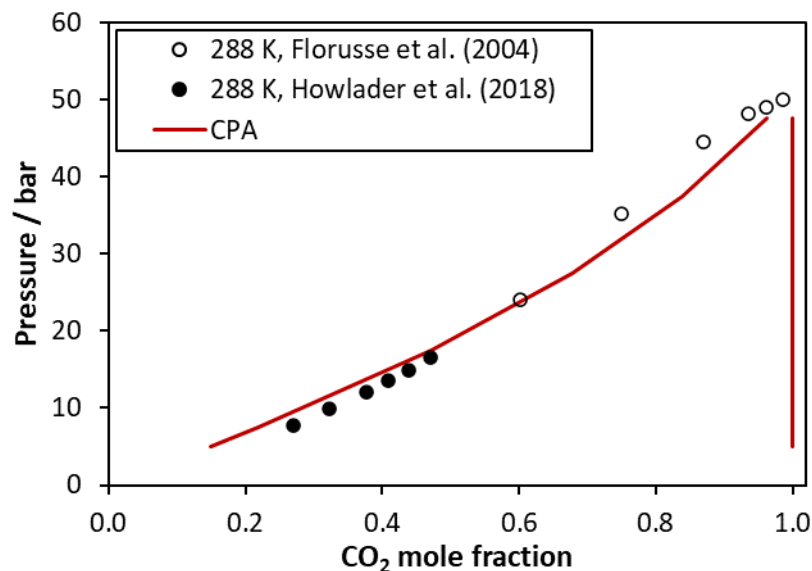

**Figure S9.** CO<sub>2</sub> - tributyrin VLE at 288 K. Experimental data [44,45] and CPA correlations using the binary parameter of Table 5 of the main article.

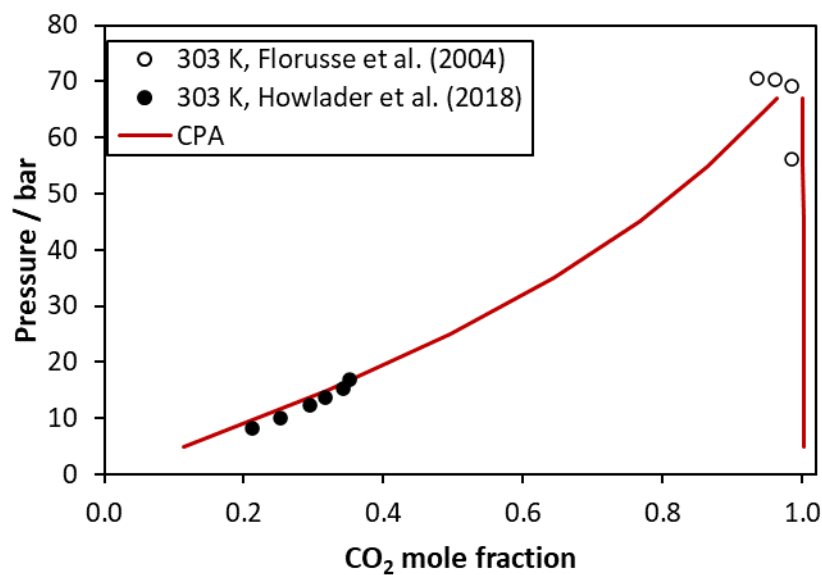

**Figure S10.** CO<sub>2</sub> - tributyrin VLE at 303 K. Experimental data [44,45] and CPA correlations using the binary parameter of Table 5 of the main article.

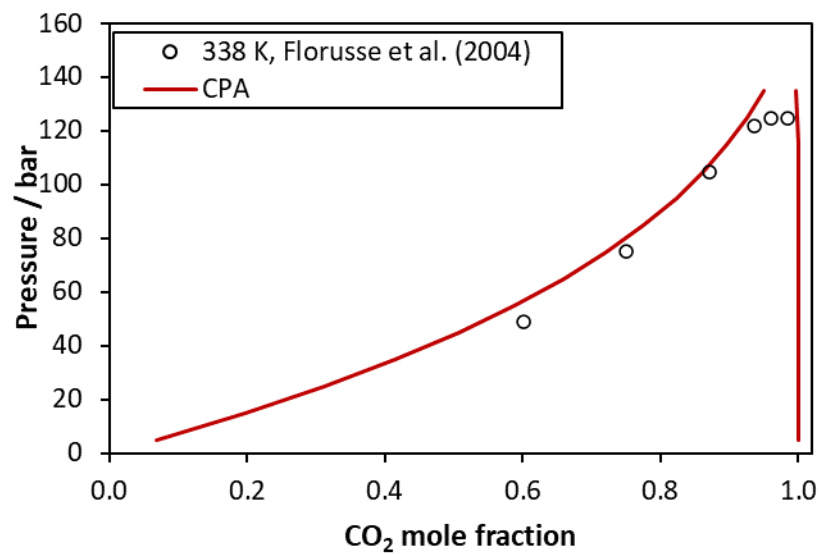

**Figure S11.** CO<sub>2</sub> - tributyrin VLE at 338 K. data [44,45] and CPA correlations using the binary parameter of Table 5 of the main article.



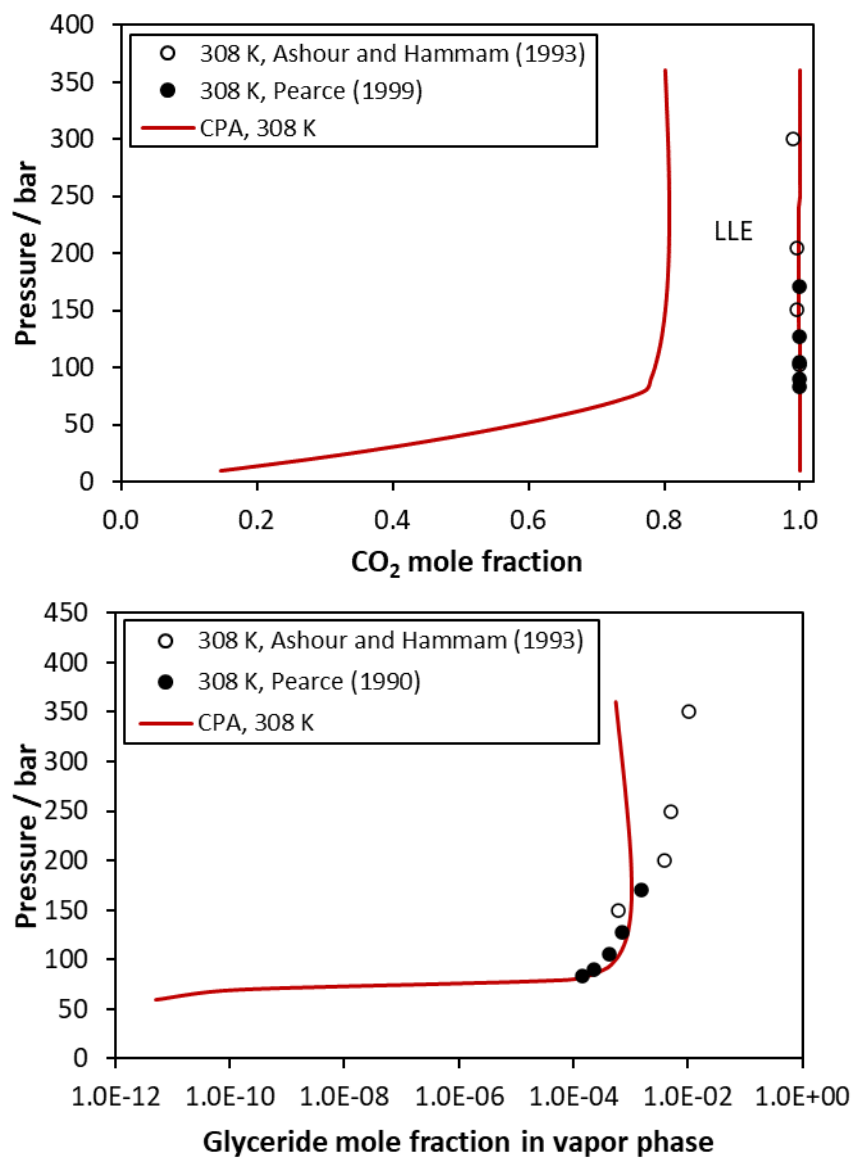

**Figure S12.** CO<sub>2</sub> - trilaurin VLE and LLE at 308 K. Experimental data [48,49] and CPA correlations using the binary parameter of Table 5 of the main article.

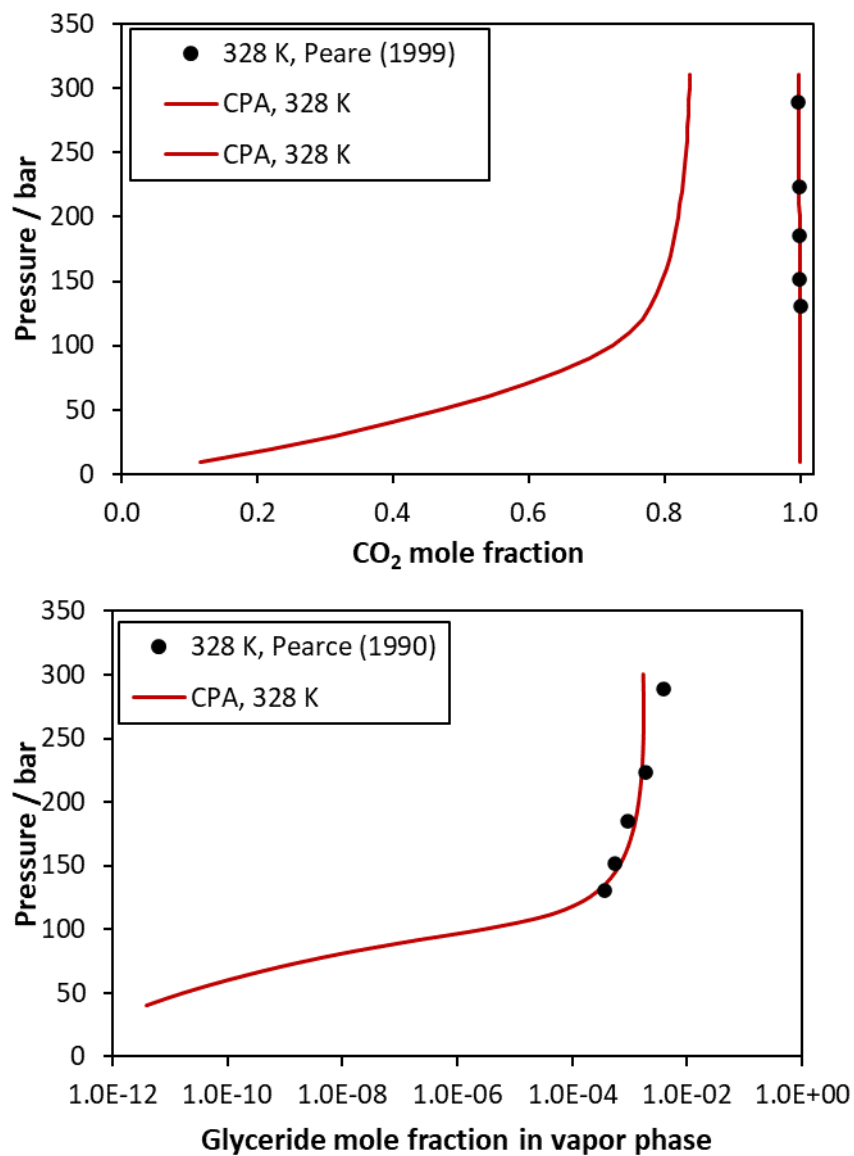

**Figure S13.** CO<sub>2</sub> - trilaurin VLE at 328 K. Experimental data [48] and CPA correlations using the binary parameter of Table 5 of the main article.

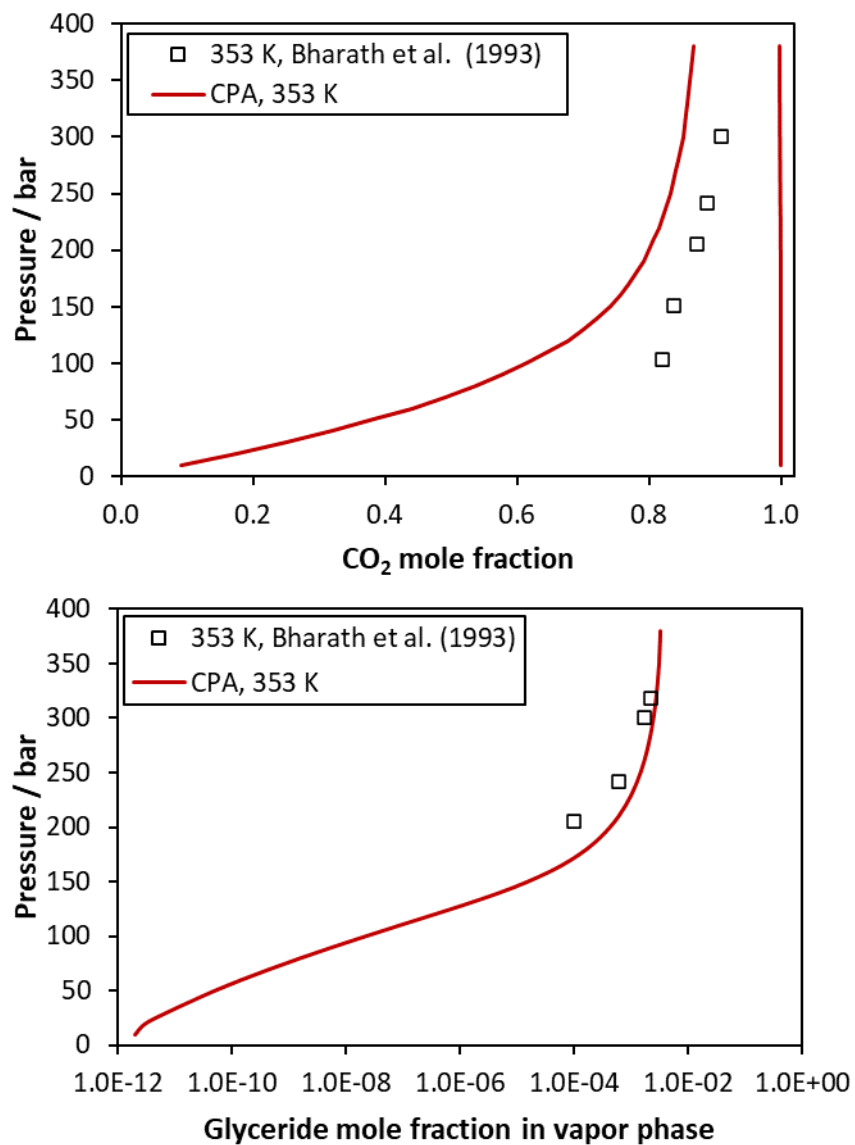

**Figure S14.** CO<sub>2</sub> - trilaurin VLE at 353 K. Experimental data [47] and CPA correlations using the binary parameter of Table 5 of the main article.

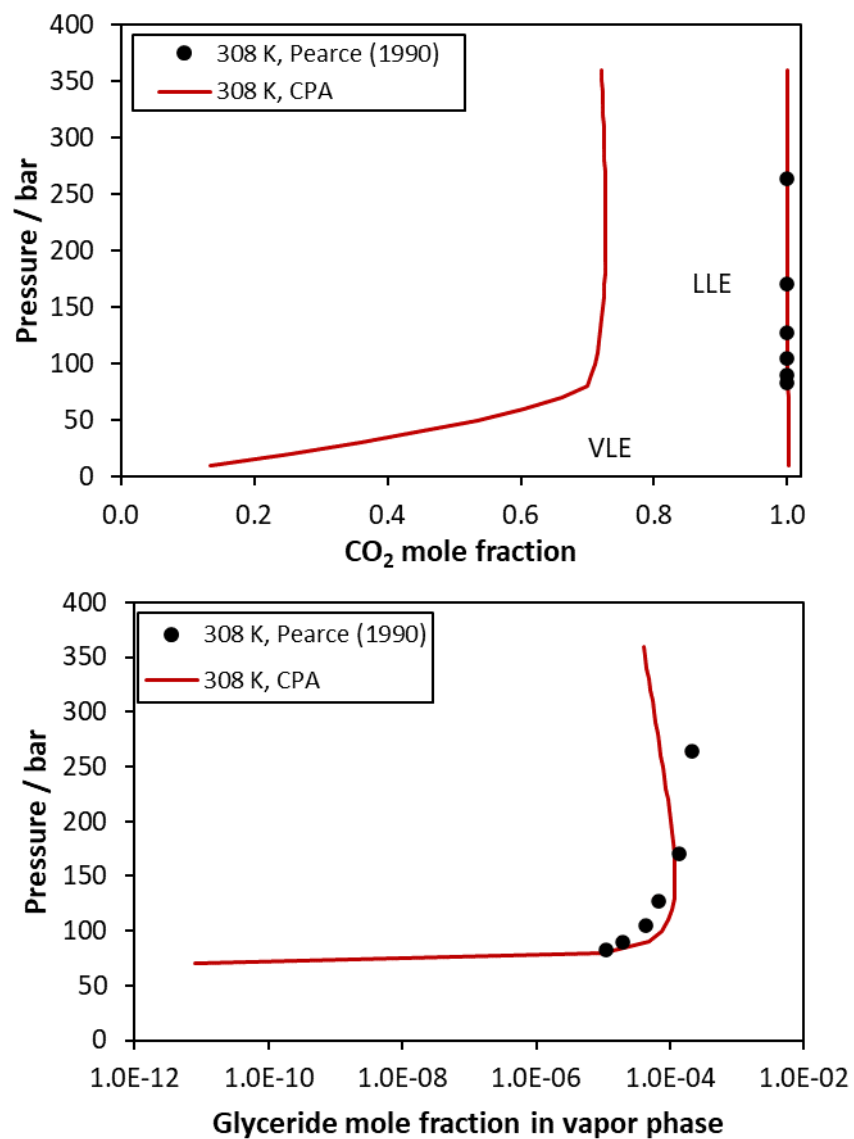

**Figure S15.** CO<sub>2</sub> – trimyrustin VLE at 308 K. Experimental data [48] and CPA correlations using the binary parameter of Table 5 of the main article.

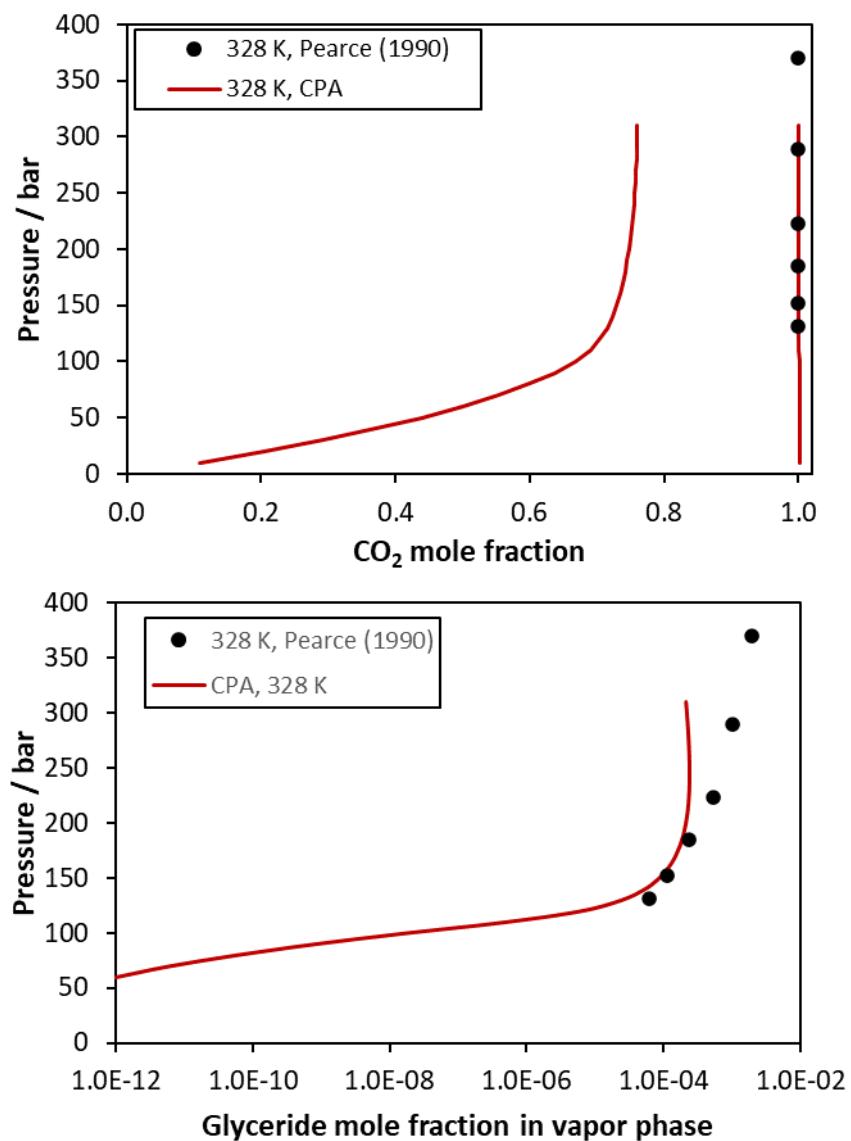

**Figure S16.** CO<sub>2</sub> – trimyristin VLE at 328 K. Experimental data [48] and CPA correlations using the binary parameter of Table 5 of the main article.

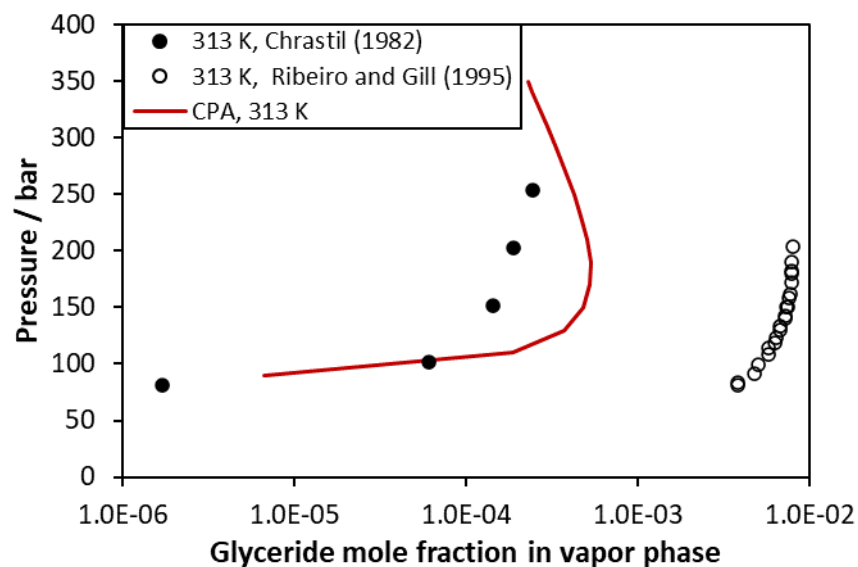

**Figure S17.** CO<sub>2</sub> – triolein VLE at 313 K (vapor phase compositions). Experimental data [53,54] and CPA correlations using the binary parameter of Table 5 of the main article.

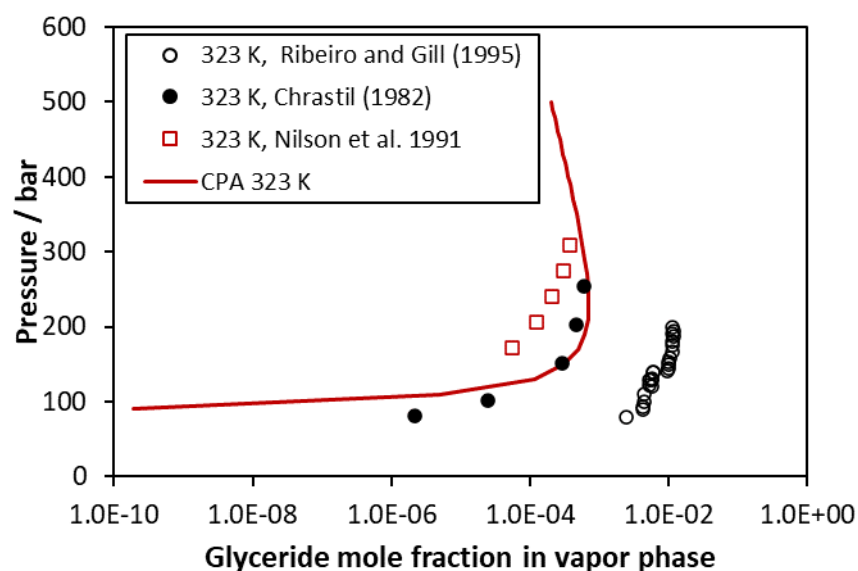

**Figure S18.** CO<sub>2</sub> – triolein VLE at 323 K (vapor phase compositions). Experimental data [50,53,54] and CPA correlations using the binary parameter of Table 5 of the main article.

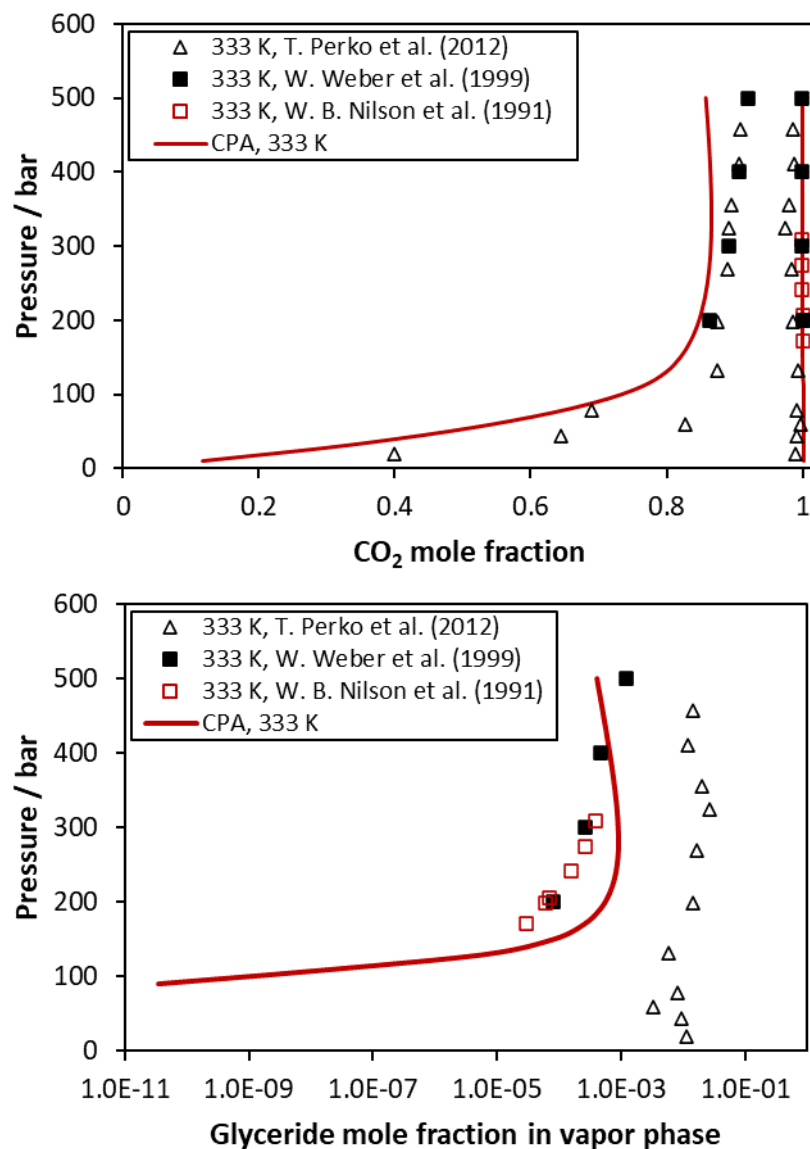

**Figure S19.** CO<sub>2</sub> – triolein VLE at 333 K. Experimental data [51-53] and CPA correlations using the binary parameter of Table 5 of the main article.

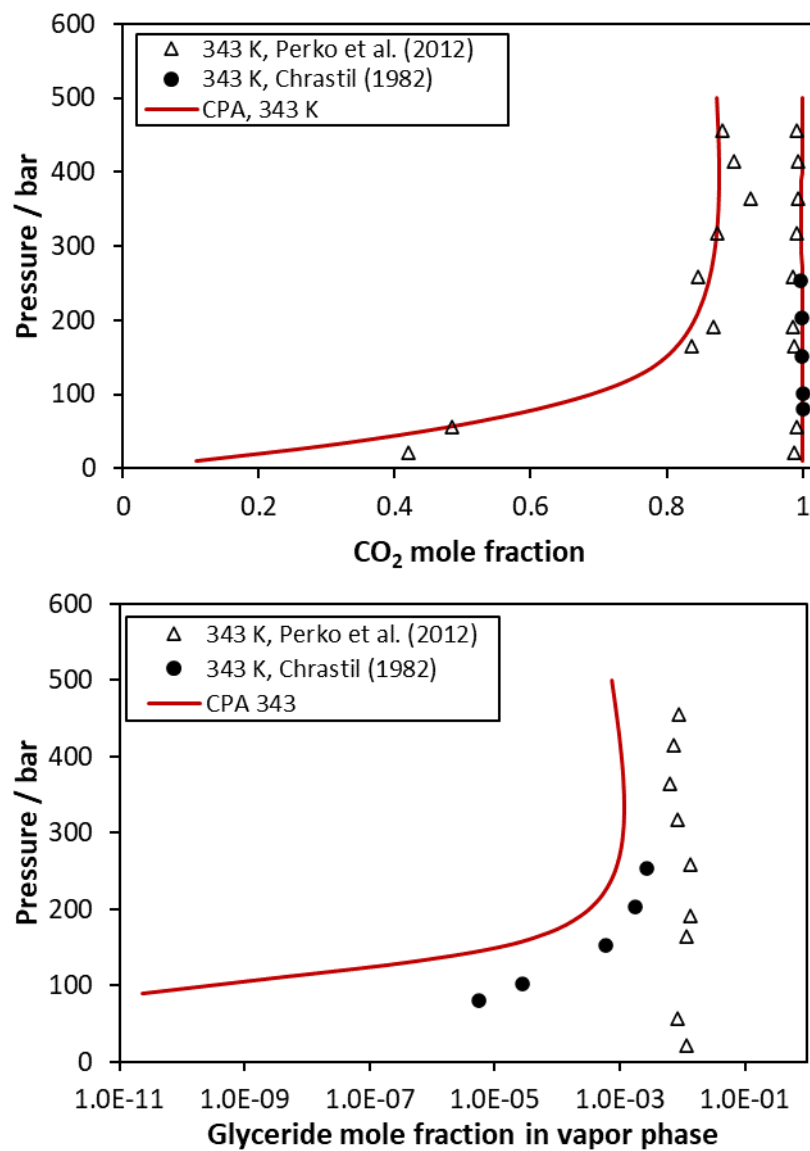

**Figure S20.** CO<sub>2</sub> – triolein VLE at 343 K. Experimental data [52,53] and CPA correlations using the binary parameter of Table 5 of the main article.
